# Supplementary material
Source: Frontiers journal article supplement (https://www.frontiersin.org/articles/230152)
Supplement: Presentation_1.PDF [file Presentation_1.PDF]

Table 1

Body weights, heart rate, systolic blood pressure and diastolic blood pressure of four groups mice.

|                                 | WT           | WT+Ex         | AMPKα2 <sup>-/-</sup> | AMPKα2 <sup>-/-</sup> +Ex |
|---------------------------------|--------------|---------------|-----------------------|---------------------------|
| Body Weight (g)                 | 30.9 ± 3.4   | 32.3 ± 2.5    | 28.7 ± 39             | 29.1 ± 2.2                |
| Heart Rate (times/min)          | 661.0 ± 91.9 | 544.2 ± 22.1* | 652.5 ± 39.3          | 582.6± 43.8*              |
| Systolic Blood Pressure (mmHg)  | 119.8 ± 7.4  | 111.7 ± 6.0   | 119.8 ± 4.2           | 120.8 ± 5.7               |
| Diastolic Blood Pressure (mmHg) | 75.3 ± 6.1   | 68.0 ± 3.3*   | 72.5 ± 9.3            | 68.9 ± 10.8               |

WT, wild type; Ex, exercise. Value are mean ± SEM (n = 6 in each group)  
\*P < 0.05 versus WT mice.

Fig 1

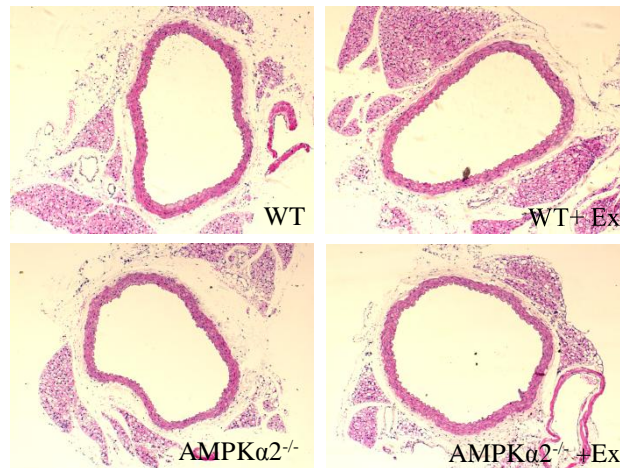

Representative micrographs of hematoxylin&eosin (H&E)-stained sections of aorta from WT and AMPK $\alpha$ 2 knockout mice with or without exercise. WT, wild type; Ex, exercise.

Fig 2

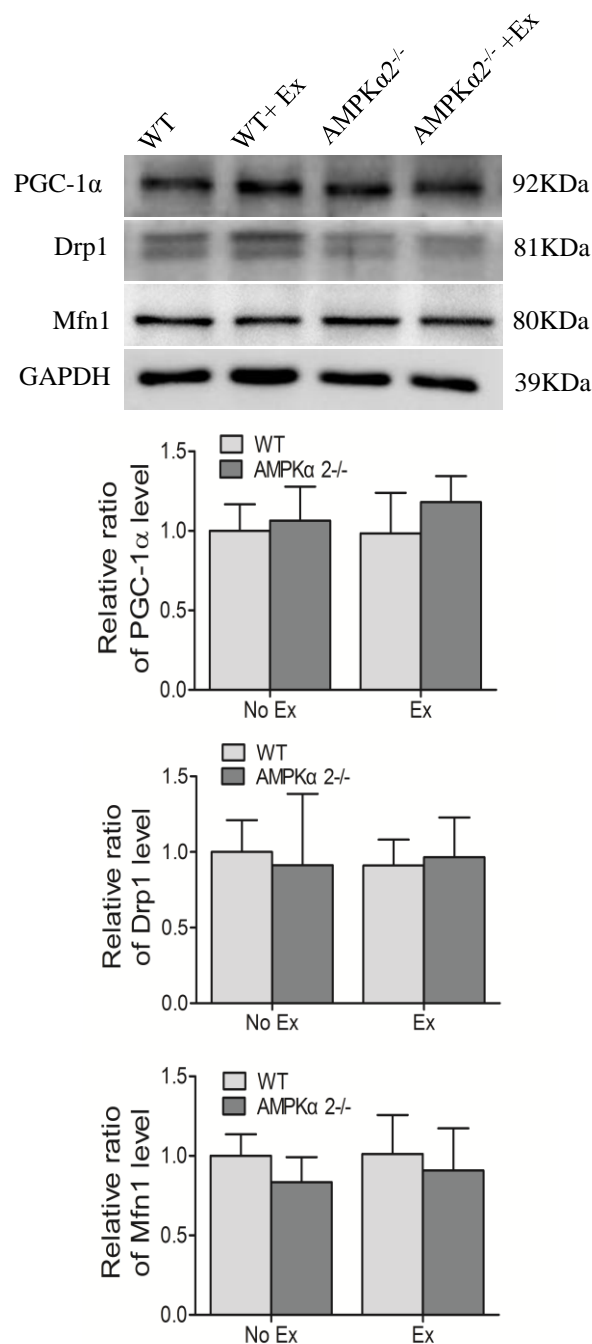

Representative western blot images and summarized data showing the expression of PGC-1α, Drp1 and Mfn1 of aorta from WT and AMPKα2 knockout mice with or without exercise. The protein levels of PGC-1α, Drp1 and Mfn1 were normalized to GAPDH. WT, wild type; Ex, exercise. Value are mean ± SEM (n = 6 in each group).
